# Supplementary material for: An Al-doped SrTiO3 photocatalyst maintaining sunlight-driven overall water splitting activity for over 1000 h of constant illumination
Source: PubMed Central journal article supplement (PMC6430014; doi:10.1039/c8sc05757e), 2019-01-24
Supplement: SC-010-C8SC05757E-s001.pdf [file SC-010-C8SC05757E-s001.pdf]

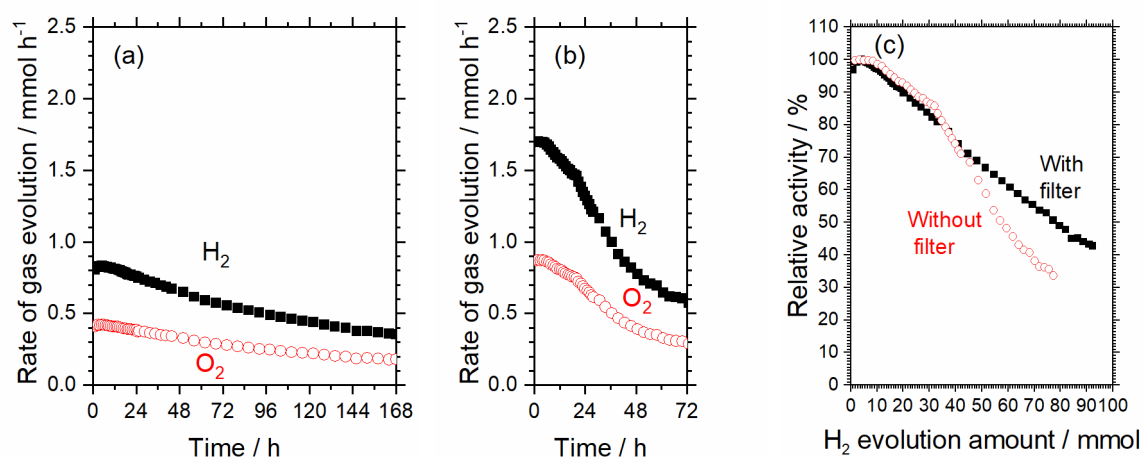

**Figure S1.** Time courses of water-splitting activity of SrTiO<sub>3</sub>:Al loaded with RhCrO<sub>x</sub> (a) with and (b) without 50% transmission neutral density filter. (c) Relative activities as functions of H<sub>2</sub> evolution amount with and without filter in place. Reaction conditions: photocatalyst, 0.1 g; reaction solution, 100 mL distilled water; reaction temperature, 291 K; light source, 300 W Xe lamp (300 nm <  $\lambda$  < 500 nm).

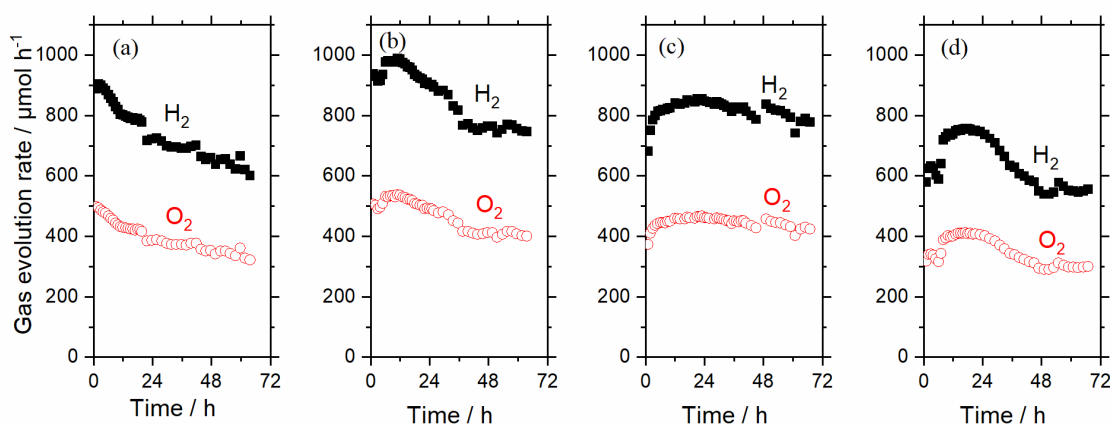

**Figure S2.** Time courses of water splitting activity of RhCrO<sub>x</sub>/SrTiO<sub>3</sub>:Al coloaded with Co species by *in situ* photodeposition at Co concentrations of (a) 0, (b) 0.1, (c) 0.3 and (d) 0.5 wt%. Reaction conditions: photocatalyst, 0.1 g; reaction solution, 100 mL distilled water; reaction temperature, 291 K; light source, 300 W Xe lamp (300 nm <  $\lambda$  < 500 nm).

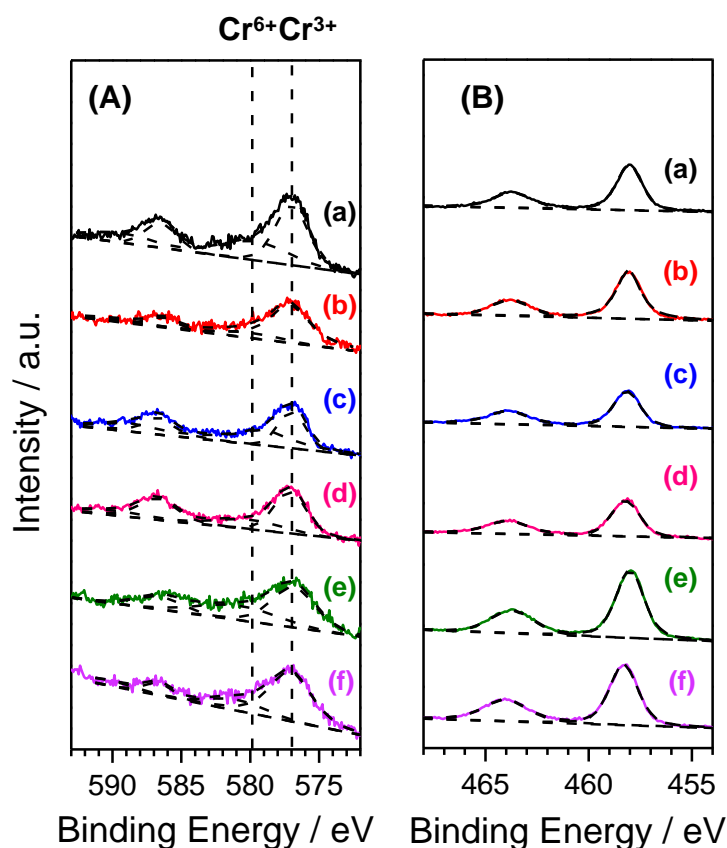

**Figure S3.** (A) Cr 2*p* and (B) Ti 2*p* XPS spectra for (a,b) RhCrO<sub>x</sub>/SrTiO<sub>3</sub>:Al, (c,d) RhCrO<sub>x</sub>/SrTiO<sub>3</sub>:Al coloaded with 0.3 wt% Co species, and (e,f) RhCrO<sub>x</sub>/SrTiO<sub>3</sub>:Al coloaded with 0.3 wt% Co species and modified with 0.3 wt% TiO<sub>2</sub> (a,c,e) before and (b,d,f) after water splitting reaction over one week time span under irradiation by high-pressure Hg lamp ( $\lambda > 300$  nm). The data in (a) were acquired following a 1 h reaction and after the sample was collected to remove water-soluble Cr<sup>6+</sup> species generated by calcination in air at 623 K.

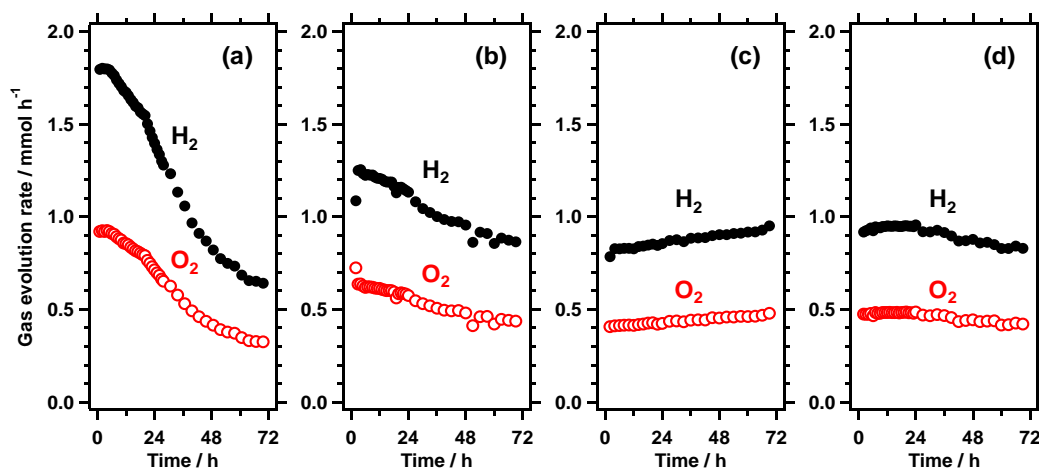

**Figure S4.** Time courses of water splitting activity of  $\text{CoOOH}/\text{RhCrO}_x/\text{SrTiO}_3:\text{Al}$  modified with  $\text{TiO}_2$  by *in situ* photodeposition at  $\text{TiO}_2$  amounts of (a) 0, (b) 0.1, (c) 0.3 and (d) 0.5 wt%. Reaction conditions: photocatalyst, 0.1 g; reaction solution, 100 mL distilled water; reaction temperature, 291 K; light source, 300 W Xe lamp ( $300 \text{ nm} < \lambda < 500 \text{ nm}$ ).

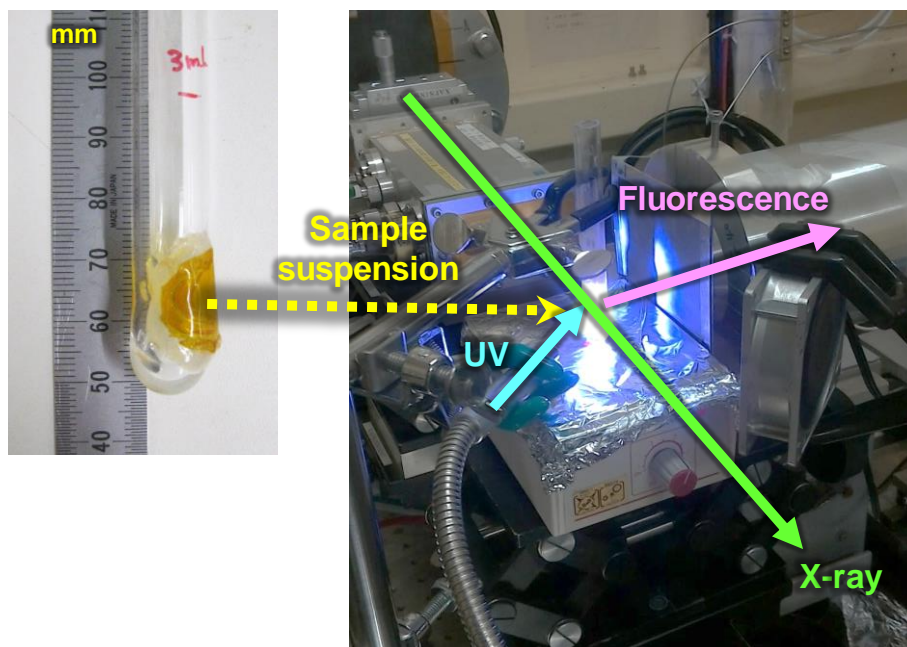

**Figure S5.** Experimental setup for operando XAFS spectroscopy of  $\text{CoOOH}/\text{RhCrO}_x/\text{SrTiO}_3:\text{Al}$  photocatalyst suspension.
